# Supplementary material for: Motivating factors, barriers and facilitators of participation in COVID-19 clinical research: A cross-sectional survey of Canadian community intensive care units
Source: PubMed Central journal article supplement (PMC9045667; doi:10.1371/journal.pone.0266770), 2022-04-27
Supplement: pone.0266770.s002.pdf [file pone.0266770.s002.pdf]

**A. DEMOGRAPHICS**

Please answer the following questions with respect to the **COMMUNITY ICU** at which you work the most.

If you work in **BOTH** a community ICU and an academic ICU, **PLEASE DESCRIBE THE COMMUNITY ICU. If you work in a community hospital centre with more than one campus, PLEASE DESCRIBE THE ICU AT WHICH YOU WORK THE MOST.**

date completed \_\_\_\_\_

1. My hospital name is:

Note: The name of your hospital is requested for the purposes of combining responses from the same institution. No hospital names will be reported in the study and data from multiple hospitals will be aggregated to ensure anonymity of all institutions.

\_\_\_\_\_

2. My hospital is located in (town/city):

\_\_\_\_\_

3. My Hospital is located in (province)

- Prince Edward Island    Newfoundland    Nova Scotia    New Brunswick    Quebec  
 Ontario    Saskatchewan    Manitoba    Alberta    British Columbia    North West Territories  
 Yukon    Nunavut

4. My primary role in the ICU is:  
(Select 1 response only)

- Physician  
 Nurse  
 Pharmacist  
 Respiratory Therapist  
 Physiotherapist  
 Occupational Therapist  
 Dietician  
 Research Coordinator/Research Assistant  
 Research Management/Administration or Hospital Administrator  
 Other

Specify primary role

\_\_\_\_\_

---

4a. My gender is:

- Female
- Male
- Non-binary
- Other
- Prefer not to say

---

Specify other gender

---

---

4b. I have been practicing in the ICU for:

- < 1 year
- 1 to 5 years
- 6 to 10 years
- 11 to 20 years
- > 20 years

---

4c. What previous research experience have you had PERSONALLY? (check all that apply):

- Clinical research as a principle investigator
- Clinical research as a local site investigator or co-investigator
- Clinical research as a research coordinator or research assistant
- Caring for patients enrolled in clinical research studies
- Research training at the graduate level (e.g. Master's degree, PhD degree)
- Research experience as a trainee (student, resident)
- Online research courses (e.g. Good Clinical Practice, Division 5 training, etc)
- Basic science research experience (i.e. laboratory research)
- Other

---

List other previous research experiences:

---

---

5. The ICU that I work in is:

- Closed (patients are cared for principally by the intensive care physicians)
- Open (patients are cared for principally by a non-intensive care physician with support from an intensivist or anesthetist)
- Both closed and open
- Other

---

Describe the model of ICU in which you work

---

---

6. The patient population in the ICU that I predominantly work in is best characterized as (check all that apply):

- Medical
- Surgical
- Trauma
- Burns
- Cardiovascular surgical
- Coronary Care
- Neurosurgical
- Transplant
- Other

---

Specify the patient population in the ICU

---

**7. Please indicate the number of ICU beds in the ICU that you work in under normal conditions (i.e., pre-COVID-19 pandemic)**

Level 3 (ventilated)

- 0
- 1
- 2
- 3
- 4
- 5
- 6
- 7
- 8
- 9
- 10
- 11
- 12
- 13
- 14
- 15
- 16
- 17
- 18
- 19
- 20
- 21
- 22
- 23
- 24
- 25
- 26
- 27
- 28
- 29
- 30
- 31
- 32
- 33
- 34
- 35
- 36
- 37
- 38
- 39
- 40
- 41
- 42
- 43
- 44
- 45
- 46
- 47
- 48
- 49
- 50

---

Level 2 (non-ventilated, step-down)

- 0
- 1
- 2
- 3
- 4
- 5
- 6
- 7
- 8
- 9
- 10
- 11
- 12
- 13
- 14
- 15
- 16
- 17
- 18
- 19
- 20
- 21
- 22
- 23
- 24
- 25
- 26
- 27
- 28
- 29
- 30
- 31
- 32
- 33
- 34
- 35
- 36
- 37
- 38
- 39
- 40
- 41
- 42
- 43
- 44
- 45
- 46
- 47
- 48
- 49
- 50

**8. Please indicate the number of ICU beds in the ICU that you work in during COVID-19 pandemic conditions**

Level 3 (ventilated)

- 0
- 1
- 2
- 3
- 4
- 5
- 6
- 7
- 8
- 9
- 10
- 11
- 12
- 13
- 14
- 15
- 16
- 17
- 18
- 19
- 20
- 21
- 22
- 23
- 24
- 25
- 26
- 27
- 28
- 29
- 30
- 31
- 32
- 33
- 34
- 35
- 36
- 37
- 38
- 39
- 40
- 41
- 42
- 43
- 44
- 45
- 46
- 47
- 48
- 49
- 50

---

Level 2 (non-ventilated, step-down)

- 0
- 1
- 2
- 3
- 4
- 5
- 6
- 7
- 8
- 9
- 10
- 11
- 12
- 13
- 14
- 15
- 16
- 17
- 18
- 19
- 20
- 21
- 22
- 23
- 24
- 25
- 26
- 27
- 28
- 29
- 30
- 31
- 32
- 33
- 34
- 35
- 36
- 37
- 38
- 39
- 40
- 41
- 42
- 43
- 44
- 45
- 46
- 47
- 48
- 49
- 50

**COVID-19 Patients**

9a. At the peak of the COVID-19 pandemic to date, what was the greatest number of COVID-19 patients cared for in your ICU at one time?

- 0
- 1 to 5
- 6 to 10
- 11 to 15
- 16 to 20
- 21 to 30
- more than 30

---

9b. Record the month in 2020 when you had the highest number of COVID-19 patients in your ICU

- Unknown
- February
- March
- April
- May
- June
- July
- August
- September
- October
- November
- December



**B. RESOURCE FOR RESERACH**

10. Do you have an electronic medical record (EMR) in your ICU?

- Yes  
 No

What is the name of your EMR?

---

10a. Which of the following capabilities does your EMR have? (check all that apply)

- Patient reports / results viewing  
 Patient vitals / monitoring entry and viewing  
 Daily healthcare professional notes  
 Order entry  
 Display imaging studies  
 Remote access (e.g., accessible from home)  
 Daily healthcare professional notes  
 Entry  
 Viewing  
 Other

Specify other capabilities your EMR has

---

11. What pre-existing research infrastructure do you have available at your ICU/hospital (check all that apply):

- Pre-existing ICU research program  
 Pre-existing research program(s) in the hospital (other departments)  
 Research coordinator(s) or research assistant(s) in the ICU  
 Research coordinator(s) or research assistant(s) in other department(s) in the hospital  
 Local research ethics board  
 Remote research ethics board (i.e. REB at another hospital)  
 Hospital research administration/office  
 On-site contract review capability  
 Research policies and procedures  
 Pharmacy department with research capability or experience  
 Clinical laboratory department with research capability or experience  
 Diagnostic imaging department with research capability or experience  
 Other

Specify other pre-existing research infrastructure you have available

---

11a. Which research programs exist in your hospital? (check all that apply):

- Oncology  
 Cardiology  
 Nephrology  
 ICU  
 Other (specify below)

---

Specify other research programs in your hospital

---

---

12. If your ICU has participated or is currently participating in clinical research, please list the names of the current studies and those that have been conducted in your ICU in the last 5 years.

**13. Please rate the degree of importance of the following infrastructures in facilitating the participation of your ICU in clinical research studies.**

|   | Not important                                                                                                                                                | 1                     | 2                     | 3                     | 4                     | 5 Very Important      |                       |
|---|--------------------------------------------------------------------------------------------------------------------------------------------------------------|-----------------------|-----------------------|-----------------------|-----------------------|-----------------------|-----------------------|
| a | Dedicated external funding to provide start-up costs for a research program                                                                                  | <input type="radio"/> | <input type="radio"/> | <input type="radio"/> | <input type="radio"/> | <input type="radio"/> | <input type="radio"/> |
| b | Dedicated external funding to sustain ongoing costs for a research program                                                                                   | <input type="radio"/> | <input type="radio"/> | <input type="radio"/> | <input type="radio"/> | <input type="radio"/> | <input type="radio"/> |
| c | The existence of a more positive "research culture" in my hospital                                                                                           | <input type="radio"/> | <input type="radio"/> | <input type="radio"/> | <input type="radio"/> | <input type="radio"/> | <input type="radio"/> |
| d | The existence of a more positive "research culture" amongst ICU staff and physicians                                                                         | <input type="radio"/> | <input type="radio"/> | <input type="radio"/> | <input type="radio"/> | <input type="radio"/> | <input type="radio"/> |
| e | Administrative support for research infrastructure from my hospital (e.g., contract review, research ethics board, policies and procedures, research office) | <input type="radio"/> | <input type="radio"/> | <input type="radio"/> | <input type="radio"/> | <input type="radio"/> | <input type="radio"/> |
| f | Pharmacy department with capacity (e.g., personnel) to randomize and dispense study drugs                                                                    | <input type="radio"/> | <input type="radio"/> | <input type="radio"/> | <input type="radio"/> | <input type="radio"/> | <input type="radio"/> |
| g | Availability of experienced research coordinators                                                                                                            | <input type="radio"/> | <input type="radio"/> | <input type="radio"/> | <input type="radio"/> | <input type="radio"/> | <input type="radio"/> |
| h | Research mentorship within my hospital                                                                                                                       | <input type="radio"/> | <input type="radio"/> | <input type="radio"/> | <input type="radio"/> | <input type="radio"/> | <input type="radio"/> |
| i | Partnership with academic hospitals                                                                                                                          | <input type="radio"/> | <input type="radio"/> | <input type="radio"/> | <input type="radio"/> | <input type="radio"/> | <input type="radio"/> |
| j | Participation in research networks that support research in community hospitals                                                                              | <input type="radio"/> | <input type="radio"/> | <input type="radio"/> | <input type="radio"/> | <input type="radio"/> | <input type="radio"/> |

Please list any other factor(s) that would FACILITATE YOUR participation in pandemic-related ICU research.

**C. MOTIVATING FACTORS TO PARTICIPATE IN COVID-19 RESERACH**

14. Please rate your degree of interest in participating in COVID-19 pandemic research

- 1=Very uninterested
- 2
- 3
- 4
- 5
- 6
- 7 = Very interested

---

15. Please explain why you are interested or not interested

**16. The following MOTIVATING FACTORS are important for your participation in research. Please indicate the level of your disagreement or agreement with the following.**

|                                                            | Strongly disagree     | Disagree              | Neither agree or disagree | Agree                 | Strongly agree        |
|------------------------------------------------------------|-----------------------|-----------------------|---------------------------|-----------------------|-----------------------|
| a. Improve care and clinical outcomes                      | <input type="radio"/> | <input type="radio"/> | <input type="radio"/>     | <input type="radio"/> | <input type="radio"/> |
| b. Advance medical knowledge                               | <input type="radio"/> | <input type="radio"/> | <input type="radio"/>     | <input type="radio"/> | <input type="radio"/> |
| c. Increase the recognition and credibility of my hospital | <input type="radio"/> | <input type="radio"/> | <input type="radio"/>     | <input type="radio"/> | <input type="radio"/> |
| d. Enhance professional opportunities in the hospital      | <input type="radio"/> | <input type="radio"/> | <input type="radio"/>     | <input type="radio"/> | <input type="radio"/> |
| e. Increase staff retention                                | <input type="radio"/> | <input type="radio"/> | <input type="radio"/>     | <input type="radio"/> | <input type="radio"/> |
| f. Increase staff career satisfaction                      | <input type="radio"/> | <input type="radio"/> | <input type="radio"/>     | <input type="radio"/> | <input type="radio"/> |
| g. Help attract healthcare professionals to hospital       | <input type="radio"/> | <input type="radio"/> | <input type="radio"/>     | <input type="radio"/> | <input type="radio"/> |
| h. Establish collaborations with other ICUs/ICU research   | <input type="radio"/> | <input type="radio"/> | <input type="radio"/>     | <input type="radio"/> | <input type="radio"/> |
| i. Stay informed about current reserach                    | <input type="radio"/> | <input type="radio"/> | <input type="radio"/>     | <input type="radio"/> | <input type="radio"/> |
| j. Provide opportunities to attend conferences             | <input type="radio"/> | <input type="radio"/> | <input type="radio"/>     | <input type="radio"/> | <input type="radio"/> |
| k. Provide opportunities for work related travel           | <input type="radio"/> | <input type="radio"/> | <input type="radio"/>     | <input type="radio"/> | <input type="radio"/> |
| l. Enhance, diversity or advance my career                 | <input type="radio"/> | <input type="radio"/> | <input type="radio"/>     | <input type="radio"/> | <input type="radio"/> |

17. Please list any other MOTIVATING FACTOR(S) that increase YOUR interest in participating in community ICU research

**D. BARRIERS TO PARTICIPATION IN COMMUNITY ICU RESEARCH**

**18. The following items are significant BARRIERS to your participation in research. Please indicate the level of your disagreement or agreement with the following.**

|                                                                                               | Strongly disagree     | Disagree              | Neither agree or disagree | Agree                 | Strongly agree        |
|-----------------------------------------------------------------------------------------------|-----------------------|-----------------------|---------------------------|-----------------------|-----------------------|
| a. Community ICUs are not known or expected to do research (identity)                         | <input type="radio"/> | <input type="radio"/> | <input type="radio"/>     | <input type="radio"/> | <input type="radio"/> |
| b. Lack of interest on the part of the ICU staff and physicians in my unit (culture)          | <input type="radio"/> | <input type="radio"/> | <input type="radio"/>     | <input type="radio"/> | <input type="radio"/> |
| c. Lack of research experience in our ICU                                                     | <input type="radio"/> | <input type="radio"/> | <input type="radio"/>     | <input type="radio"/> | <input type="radio"/> |
| d. Lack of start-up funding for a research coordinator                                        | <input type="radio"/> | <input type="radio"/> | <input type="radio"/>     | <input type="radio"/> | <input type="radio"/> |
| e. Inadequate per-patient payments from study sponsors to sustain research coordinator salary | <input type="radio"/> | <input type="radio"/> | <input type="radio"/>     | <input type="radio"/> | <input type="radio"/> |
| f. Staff workload is too high due to pandemic-related pressures                               | <input type="radio"/> | <input type="radio"/> | <input type="radio"/>     | <input type="radio"/> | <input type="radio"/> |
| g. Physicians not willing to dedicate unpaid time to research                                 | <input type="radio"/> | <input type="radio"/> | <input type="radio"/>     | <input type="radio"/> | <input type="radio"/> |
| h. Negative experience(s) with research in the past                                           | <input type="radio"/> | <input type="radio"/> | <input type="radio"/>     | <input type="radio"/> | <input type="radio"/> |
| i. Hospital moratorium on research during pandemic                                            | <input type="radio"/> | <input type="radio"/> | <input type="radio"/>     | <input type="radio"/> | <input type="radio"/> |
| j. Fear related to COVID-19 and/or availability of PPE in ICU                                 | <input type="radio"/> | <input type="radio"/> | <input type="radio"/>     | <input type="radio"/> | <input type="radio"/> |

Please list any other BARRIER(S) to YOUR participation in community ICU research

**E. QUESTIONS ON POTENTIAL RESEARCH PROGRAM MODELS**

19. There may be funding available to assist Canadian community ICUs with participating in pandemic-related research. Several models have been proposed to assist Canadian community ICUs with participating in pandemic-related research should funding be available. Please review the following models.

Model A:

- Study sponsor will subsidize a portion of research coordinator salary (i.e. 30-50%) for 6-12 months to enable ICU to start-up a local research program
- Local site will provide an MD to act as site investigator who will help the RC to get the study up and running locally
- ICU/hospital will hire research coordinator locally
- ICU will be free to enrol patients for multiple studies and can continue program after sponsorship period finishes

Model B:

- Sponsor will hire and pay a research coordinator who will recruit patients for a single research study
- Local site will provide an MD to act as site investigator who will help the RC to get the study up and running locally
- The research coordinator will work remotely (i.e. will obtain consent over the phone, access EMR remotely, coordinate study enrolment with MDs and RNs by phone)
- The RC will NOT be available to work on other studies and the arrangement will terminate at the end of the study

Model C:

- Sponsor will hire and pay a research coordinator who will recruit patients for a package of studies (pandemic and non-pandemic)
- Local site will provide MDs to act as site investigators and will help the RC to get the studies up and running locally
- The research coordinator will work on-site to coordinate the studies
- The per-patient payments will revert to the sponsors, not to the hospital/ICU
- After the end of the sponsorship period, the hospital/ICU will be free to decide if they wish to continue research and to hire a research coordinator locally

After reviewing the Models above I would prefer:

- Model A  
 Model B  
 Model C

---

20. Please explain your choice of Model

---

21. Is there an alternative model that you think would work better? If so, please indicate below.
